# Supplementary material for: Synergistic effects of B/S co-doped spongy-like hierarchically porous carbon for a high performance zinc-ion hybrid capacitor
Source: Royal Society of Chemistry journal article supplement (doi:10.1039/d1nr07818f), 2022-01-01
Supplement: d1nr07818f1.pdf [file d1nr07818f1.pdf]

## Synergistic Effects of B/S Co-doped Spongy-like Hierarchically Porous Carbon for High Performance Zinc-ion Hybrid Capacitor

Xiaopeng Zhang<sup>a</sup>, Yingge Zhang<sup>a</sup>, Jialong Qian<sup>a</sup>, Yihe Zhang<sup>a,\*</sup>, Li Sun<sup>a,\*\*</sup>, Qi Wang<sup>a</sup>

<sup>a</sup> Beijing Key Laboratory of Materials Utilization of Nonmetallic Minerals and Solid Wastes, National Laboratory of Mineral Materials, School of Materials Science and Technology, China University of Geosciences, Beijing 100083, China.

### This supporting information file includes:

**Section S1.** The XPS survey spectra of and high resolution O1s spectra of the B<sub>x</sub>S<sub>y</sub>C.

**Section S2.** The electrochemical analysis of B<sub>x</sub>S<sub>y</sub>C electrodes.

**Section S3.** The GCD curves of B- and/or S atoms with different doping amounts.

**Section S4.** The GCD curves of B<sub>2</sub>S<sub>3</sub>C electrode at different current densities and the CV curves of B<sub>2</sub>S<sub>3</sub>C at different scanning rates.

**Section S5.** Ragone plot of B<sub>2</sub>S<sub>3</sub>C electrode compared with recent work.

**Section S6.** SEM images of B<sub>2</sub>S<sub>3</sub>C after 10000 cycles.

**Section S7.** Contact angles of ZnSO<sub>4</sub> solution droplet at the interface of B<sub>2</sub>S<sub>3</sub>C after 10000 cycles.

**Section S8.** High-resolution XPS survey of B<sub>2</sub>S<sub>3</sub>C after several cycling.

**Section S9.** The detailed information about the calculation of energy barrier.

**Section S10.** Pore structure parameters of B<sub>0</sub>S<sub>0</sub>C, B<sub>2</sub>S<sub>0</sub>C, B<sub>0</sub>S<sub>3</sub>C, and B<sub>2</sub>S<sub>3</sub>C.

**Section S11.** Contents of C, O, B, and S elements in B<sub>0</sub>S<sub>0</sub>C, B<sub>2</sub>S<sub>0</sub>C, B<sub>0</sub>S<sub>3</sub>C, and B<sub>2</sub>S<sub>3</sub>C.

**Section S1.** The XPS survey spectra of and high resolution O1s spectra of the B<sub>x</sub>S<sub>y</sub>C.

---

\*Corresponding author. E-mail address: zyh@cugb.edu.cn (Y. Zhang).

\*\*Corresponding author. E-mail address: sunli@cugb.edu.cn (L. Sun).

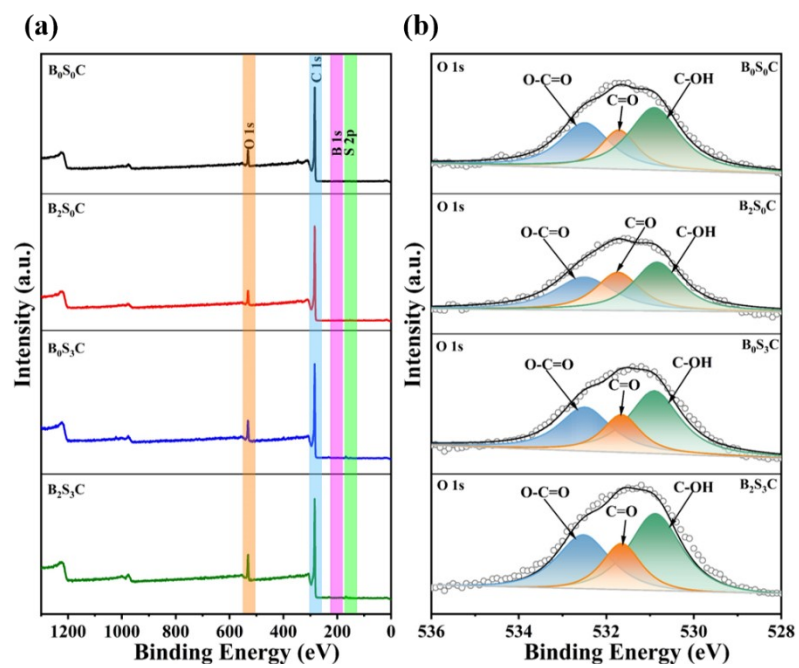

**Fig. S1.** (a) XPS survey spectra of and (b) high resolution O1s spectra of the  $B_xS_yC$ .

**Section S2.** The electrochemical analysis of  $B_xS_yC$  electrodes.

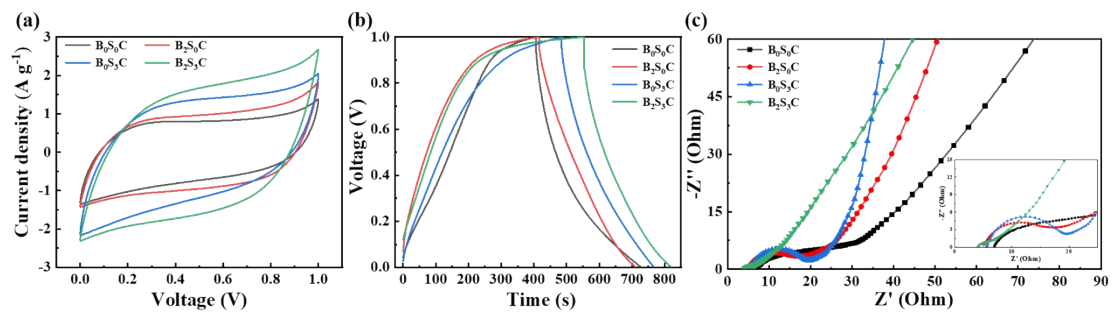

**Fig. S2.** Electrochemical analysis of  $B_xS_yC$ : (a) CV curves at  $10 \text{ mV s}^{-1}$ , (b) GCD curves at  $0.5 \text{ A g}^{-1}$ , and (c) Nyquist plots.

**Section S3.** The GCD curves of B- and/or S atoms with different doping amounts.

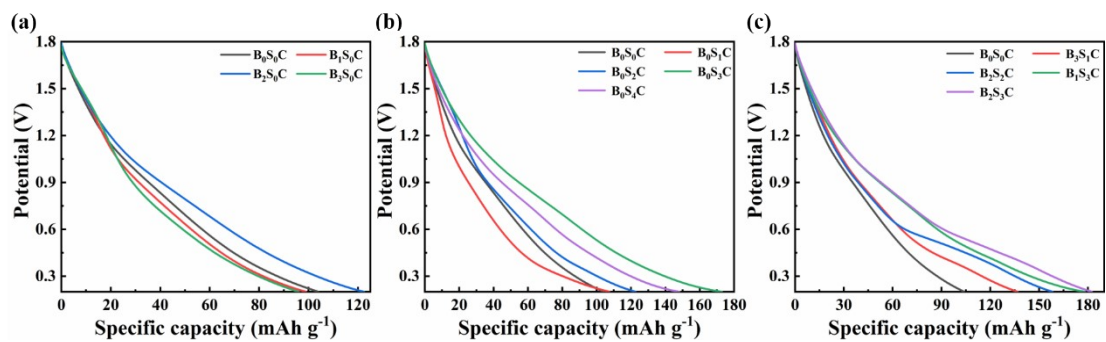

**Fig. S3.** The GCD curves of (a) B<sub>x</sub>S<sub>0</sub>C, (b) B<sub>0</sub>S<sub>y</sub>C and (c) B<sub>x</sub>S<sub>y</sub>C.

**Section S4.** The GCD curves of  $B_2S_3C$  electrode at different current densities and the CV curves of  $B_2S_3C$  at different scanning rates.

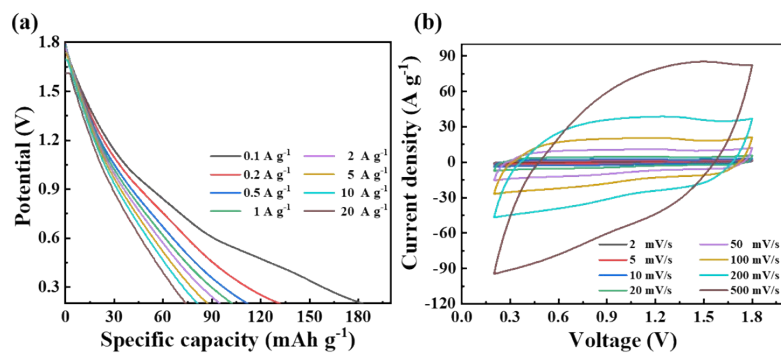

**Fig. S4.** (a) The GCD curves of  $B_2S_3C$  at different current densities, (b) the CV curves of  $B_2S_3C$  at different scanning rates.

Section S5. Ragone plot of B<sub>2</sub>S<sub>3</sub>C electrode compared with recent work.

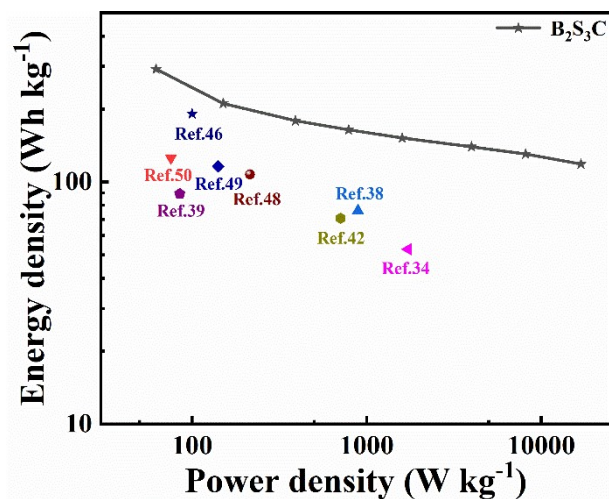

Fig. S5. Ragone plot of B<sub>2</sub>S<sub>3</sub>C electrode compared with recent work.

**Section S6.** SEM images of  $B_2S_3C$  after 10000 cycles.

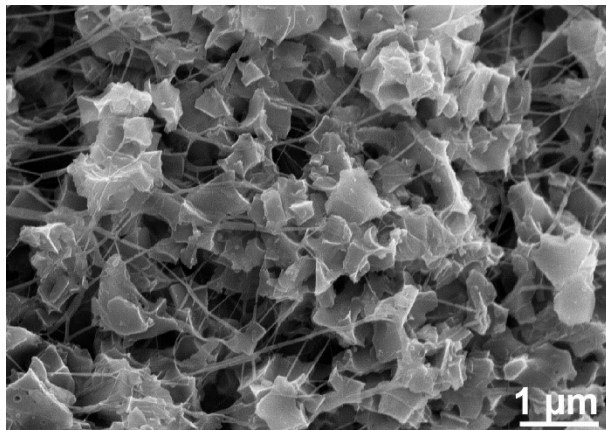

**Fig. S6.** SEM images of  $B_2S_3C$  after 10000 cycles.

**Section S7.** Contact angles of  $\text{ZnSO}_4$  solution droplet at the interface of  $\text{B}_2\text{S}_3\text{C}$  after 10000 cycles.

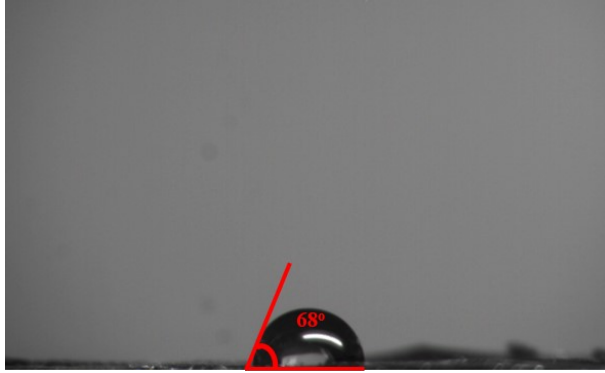

**Fig. S7.** Contact angles of  $\text{ZnSO}_4$  solution droplet at the interface of  $\text{B}_2\text{S}_3\text{C}$  after 10000 cycles.



**Section S8.** High-resolution XPS survey of  $B_2S_3C$  after several cycling.

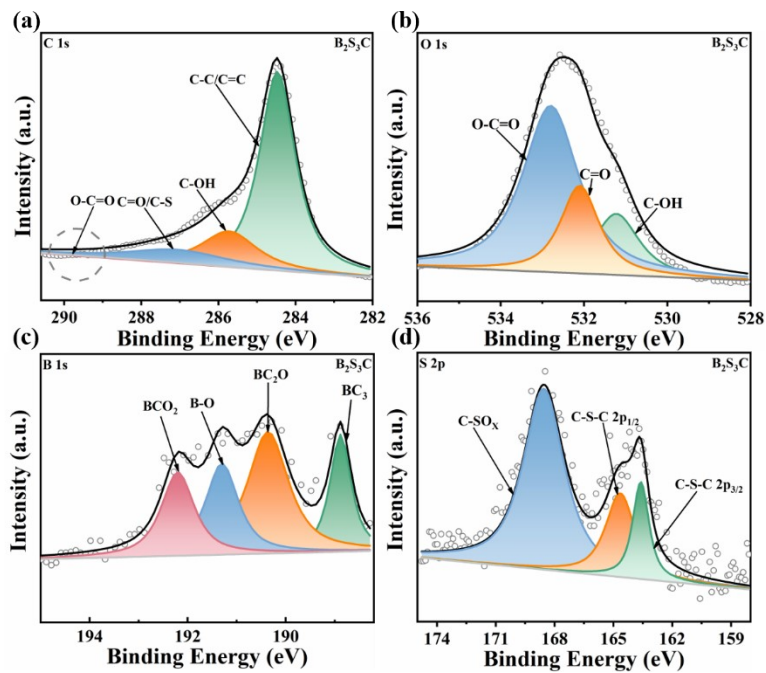

**Fig. S8.** High-resolution XPS survey of  $B_2S_3C$  after several cycling: (a) C 1s, (b) O 1s, (c) B 1s, (d) S 2p.

**Section S9.** The detailed information about the calculation of energy barrier.

The energy barrier calculation is calculated based on adsorption energy. The calculation formula of the adsorption energy is  $\Delta E_{ad} = \Delta E_{C-MO} - (\Delta E_C + \Delta E_{MO})$ , where the definition of the values in the formula was listed below:

$\Delta E_{ad}$ : adsorption energy of molecule on carbon

$\Delta E_{C-MO}$ : The total energy of carbon with molecule adsorpted on

$\Delta E_C$ : The total energy of carbon

$\Delta E_{MO}$ : The energy of a single molecule

**Section S10.** Pore structure parameters of B<sub>0</sub>S<sub>0</sub>C, B<sub>2</sub>S<sub>0</sub>C, B<sub>0</sub>S<sub>3</sub>C, and B<sub>2</sub>S<sub>3</sub>C.

**Table S1** Pore structure parameters of B<sub>0</sub>S<sub>0</sub>C, B<sub>2</sub>S<sub>0</sub>C, B<sub>0</sub>S<sub>3</sub>C, and B<sub>2</sub>S<sub>3</sub>C.

| <b>Samples</b>                     | <b>D<sub>ap</sub></b><br><b>(nm)</b> | <b>S<sub>BET</sub></b><br><b>(m<sup>2</sup> g<sup>-1</sup>)</b> | <b>S<sub>micro</sub></b><br><b>(m<sup>2</sup> g<sup>-1</sup>)</b> | <b>V<sub>t</sub></b><br><b>(cm<sup>3</sup> g<sup>-1</sup>)</b> | <b>V<sub>micro</sub></b><br><b>(cm<sup>3</sup> g<sup>-1</sup>)</b> |
|------------------------------------|--------------------------------------|-----------------------------------------------------------------|-------------------------------------------------------------------|----------------------------------------------------------------|--------------------------------------------------------------------|
| <b>B<sub>0</sub>S<sub>0</sub>C</b> | 1.74                                 | 1105                                                            | 1033                                                              | 0.39                                                           | 0.401                                                              |
| <b>B<sub>2</sub>S<sub>0</sub>C</b> | 1.92                                 | 1507                                                            | 1249                                                              | 0.62                                                           | 0.501                                                              |
| <b>B<sub>0</sub>S<sub>3</sub>C</b> | 2.44                                 | 2269                                                            | 209                                                               | 1.09                                                           | 0.131                                                              |
| <b>B<sub>2</sub>S<sub>3</sub>C</b> | 2.56                                 | 2364                                                            | 565                                                               | 1.13                                                           | 0.258                                                              |

**Section S11.** Contents of C, O, B, and S elements in  $B_0S_0C$ ,  $B_2S_0C$ ,  $B_0S_3C$ , and  $B_2S_3C$ .

**Table S2** Contents of C, O, B, and S elements in  $B_0S_0C$ ,  $B_2S_0C$ ,  $B_0S_3C$ , and  $B_2S_3C$ .

| <b>Samples</b> | <b>C1s (%)</b> | <b>O1s (%)</b> | <b>B1s (%)</b> | <b>S2p (%)</b> |
|----------------|----------------|----------------|----------------|----------------|
| $B_0S_0C$      | 93.39          | 6.61           | 0.00           | 0.00           |
| $B_2S_0C$      | 92.28          | 6.81           | 0.91           | 0.00           |
| $B_0S_3C$      | 89.57          | 9.05           | 0.00           | 1.38           |
| $B_2S_3C$      | 88.05          | 9.66           | 0.91           | 1.38           |
